# Supplementary material for: Alginate beads containing layered double hydroxide intercalated with borate: a potential slow-release boron fertilizer for application in sandy soils
Source: Royal Society of Chemistry journal article supplement (doi:10.1039/d0nj03571h), 2020-01-01
Supplement: d0nj03571h1.pdf [file d0nj03571h1.pdf]

**New Journal of Chemistry**

**Electronic Supplementary Information:**

**ALGINATE BEADS CONTAINING LAYERED DOUBLE HYDROXIDE INTERCALATED WITH  
BORATE: A POTENTIAL SLOW-RELEASE BORON FERTILIZER FOR APPLICATION IN  
SANDY SOILS**

Gustavo Franco de Castro,<sup>\*a</sup> Lincoln Zotarelli,<sup>b</sup> Edson Marcio Mattiello,<sup>a</sup> and Jairo Tronto<sup>\*c</sup>

<sup>a</sup> Federal University of Viçosa, Department of Soil, Viçosa - MG, Brazil. E-mail: gustavofcastro@ymail.com; mattielloem@gmail.com.

<sup>b</sup> University of Florida, Horticultural Sciences Department, 1241 Fifield Hall, Gainesville - FL, United States of America. E-mail: lzota@ufl.edu.

<sup>c</sup> Federal University of Viçosa, Institute of Exact and Technological Sciences, Rio Paranaíba - MG, Brazil. E-mail: jairotronto@ufv.br.

**\*Corresponding author:**

Gustavo Franco de Castro; Phone: +51 (31)998286683; E-mail address: gustavofcastro@ymail.com;

Jairo Tronto; Phone: +51 (34)999474119; E-mail address: jairotronto@ufv.br.

**Table S1:** Chemical characterization of the irrigation water collected in Hastings Agricultural Extension Center research farm located in Hastings, FL, U.S.

| Element                          | Level | Element                           | Level  |
|----------------------------------|-------|-----------------------------------|--------|
| Nitrate (mg L <sup>-1</sup> )    | 0.28  | Iron (mg L <sup>-1</sup> )        | 0.05   |
| Phosphorus (mg L <sup>-1</sup> ) | 0.04  | Manganese (mg L <sup>-1</sup> )   | 0.01   |
| Potassium (mg L <sup>-1</sup> )  | 2.8   | Sulfate (mg L <sup>-1</sup> )     | 0.02   |
| Magnesium (mg L <sup>-1</sup> )  | 12.4  | pH                                | 8      |
| Calcium (mg L <sup>-1</sup> )    | 96.47 | Chloride (mg L <sup>-1</sup> )    | 23     |
| Sodium (mg L <sup>-1</sup> )     | 15.27 | Carbonate (mg L <sup>-1</sup> )   | 48     |
| Boron (mg L <sup>-1</sup> )      | 0.12  | Bicarbonate (mg L <sup>-1</sup> ) | 448.35 |

**Total concentration of nitrogen (N) in the LDH-B-ALG and BA-ALG fertilizers:**

LDH-B-ALG and BA-ALG presented a low fraction of N in their compositions. Nitrogen is a macronutrient required in relatively large amounts, and it is directly related to plant growth and development. The total N concentration was 15.0 g kg<sup>-1</sup> in LDH-B-ALG (1.50% of N) and 6.0 g kg<sup>-1</sup> in BA-ALG (0.60% of N). In the present study, the total N applied from LDH-B-ALG and BA-ALG was considered negligible. The total amount of LDH-B-ALG and BA-ALG was calculated to supply B, considering the plant's relatively low B requirement. The B rates applied in this study were 0, 0.5, 1.0, 3.0, and 5.0 mg dm<sup>-3</sup> of B in the "Greenhouse experiment without leaching" and 2.0 mg dm<sup>-3</sup> of B in the "Greenhouse experiment with leaching". Under the highest B rate (5.0 mg dm<sup>-3</sup>), the total N applied as LDH-B-ALG and BA-ALG corresponded to less than 1% of the total N supplied (200 mg dm<sup>-3</sup> of N as urea source) in the first and second cultivations at pre-planting and sidedress. Therefore, the contribution of N from LDH-B-ALG and BA-ALG was not considered.

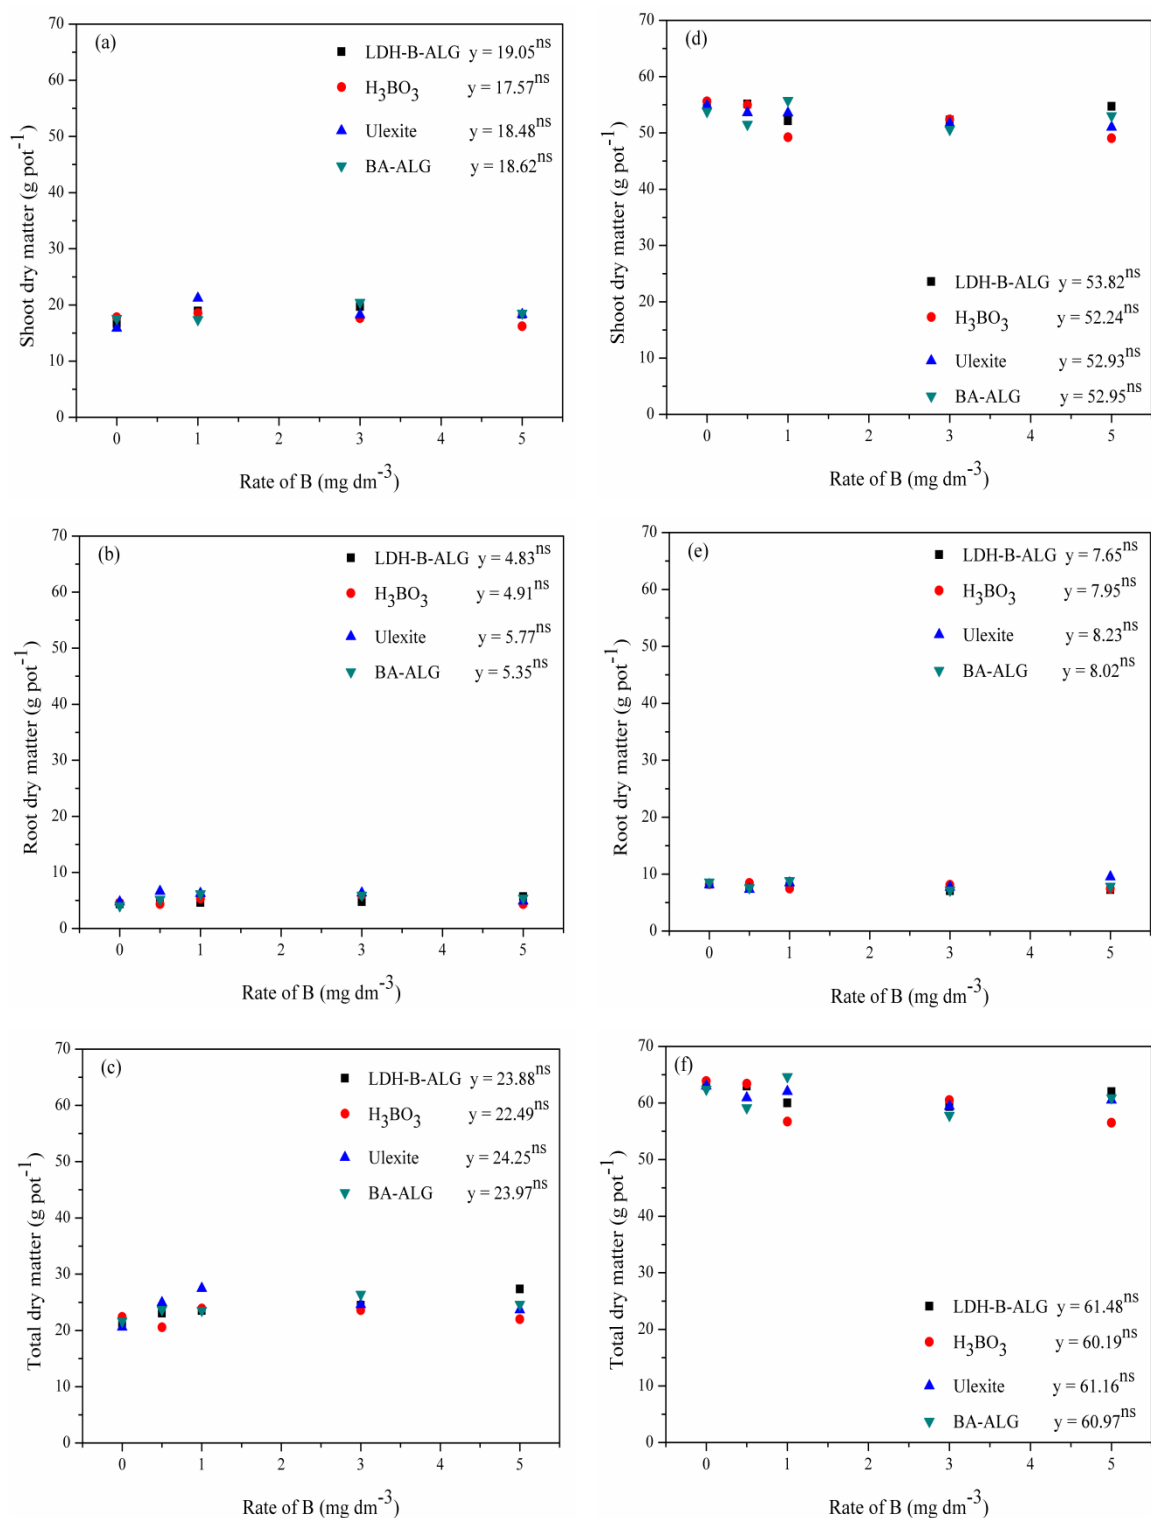

**Fig. S1:** Shoot, root and total dry matter as a function of the applied B ( $H_3BO_3$ , BA-ALG, Ulexite, and LDH-B-ALG) in first (a, b, and c) and second (d, e, and f) cultivation. ns = not significant.

49

50

**Cumulative Release and Leaching of Boron from Mg<sub>2</sub>Al-B-LDH, LDH-B-ALG, H<sub>3</sub>BO<sub>3</sub> and BA-ALG:**

The B release test was performed and adapted from the “*in vitro*” release method, described by Bin Hussein and coworkers.<sup>1</sup> A factorial 6 x 2 was established with six collection times (0, 0.5, 1, 2, 4, and 6 hours), and two B sources (LDH-B-ALG and Mg<sub>2</sub>Al-B-LDH). The experiment was conducted in a randomized complete block design with four replicates. The water used in the boron release test was H<sub>2</sub>O deionized-Milli-Q system. Using an Erlenmeyer’s flask with 250 mL of capacity, 45 mg L<sup>-1</sup> of total B from the B sources and 100 mL of the water were added. At pre-established times (0, 0.5, 1, 2, 4, and 6 hours), a slight agitation was performed to homogenize the solution and aliquots of 5 mL were withdrawn. Immediately afterwards, 5 mL of the water was added in order to keep the volume constant. The analyses of B concentration were performed according to the method described by López and coworkers.<sup>2</sup>

The leaching in soil columns was performed the same as described in section “2.2 Boron leaching in soil columns” of this manuscript, except for the boron sources (LDH-B-ALG and Mg<sub>2</sub>Al-B-LDH) and incubation time (1, 5, 10, 15, 20, 25, and 30 days).

The B release and leaching tests were replicated comparing H<sub>3</sub>BO<sub>3</sub> and BA-ALG sources. The collection and incubation times was the same previously described.

The cumulative release and leaching of B from LDH-B-ALG and Mg<sub>2</sub>Al-B-LDH are shown in Fig. S2a. In the first collection, the total B released from LDH-B-ALG and Mg<sub>2</sub>Al-B-LDH were equivalent to 0.6% and 0.7%, respectively of the total B. After 6 hours of LDH-B-ALG and Mg<sub>2</sub>Al-B-LDH application, 54.7% and 100% of the B were released, respectively. LDH-B-ALG presented a cumulative B release significantly lower at 2, 4, and 6 hours of collection than Mg<sub>2</sub>Al-B-LDH source. For H<sub>3</sub>BO<sub>3</sub> and BA-ALG sources (Fig S2c), the B release from BA-ALG was significantly lower at 0.5, 1, and 2 hours compared to H<sub>3</sub>BO<sub>3</sub>. The total B released (100%) from H<sub>3</sub>BO<sub>3</sub> and BA-ALG were at 2 and 4 hours of collection, respectively.

Regarding B leaching, as expected, the leachate had more quantity of B when Mg<sub>2</sub>Al-B-LDH was applied (Fig. S2b). For the first leaching collection time, 1.7% and 5.2% of the total B applied were leached from the LDH-B-ALG and Mg<sub>2</sub>Al-B-LDH sources, respectively. At 30 days, after the LDH-B-ALG and Mg<sub>2</sub>Al-B-LDH

application, 67% and 88% of B was leached, respectively. The B leaching from LDH-B-ALG was significantly lower at 10, 15, 20, 25, and 30 days of incubation compared to  $Mg_2Al$ -B-LDH. These results showed a higher B leaching profile from  $Mg_2Al$ -B-LDH compared to LDH-B-ALG. The slow leaching profile was also confirmed for BA-ALG, in which in all incubation times the B leached was lower compared to  $H_3BO_3$  (Fig. S2d).

The results presented by LDH-B-ALG in the release and leaching of B study, suggested a lower release and leaching profile by LDH-B-ALG compared to  $Mg_2Al$ -B-LDH, showing an advantage in producing LDH-B-ALG beads compared to the  $Mg_2Al$ -B-LDH in powder form.

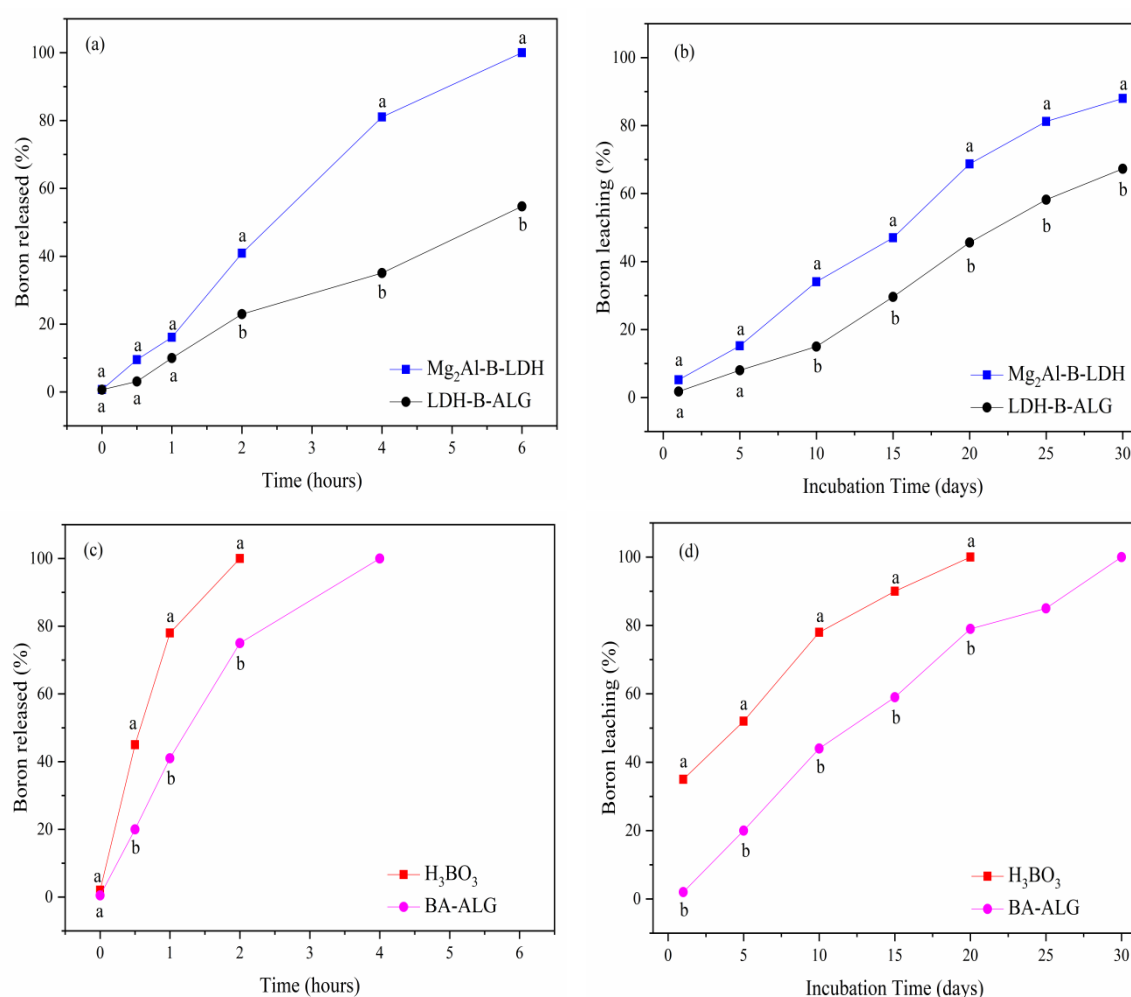

**Fig. S2:** Cumulative release (a and c) and leaching (b and d) of boron from  $Mg_2Al$ -B-LDH, LDH-B-ALG,  $H_3BO_3$ , and BA-ALG. Values followed by the same lowercase letter within each time (hours) and incubation time (days), indicate that the mean of release and leaching of B, are not significantly different at  $p < 0.05$  according to Tukey test between B fertilizer sources.

94   **References**

- 95    1     M. Z. bin Hussein, Z. Zainal, A. H. Yahaya and D. W. V. Foo, *Journal of Controlled*  
96         *Release*, 2002, **82**, 417–427.
- 97    2     F. J. López, E. Giménez and F. Hernández, *Fresenius Journal of Analytical*  
98         *Chemistry*, 1993, **346**, 984–987.
